# Supplementary material
Source: PubMed Central journal article supplement (PMC3263428)
Supplement: NIHMS345913-supplement-1.pdf [file NIHMS345913-supplement-1.pdf]

## Supporting Information

### **Bioconjugate of lysozyme and the antibacterial marine sesquiterpene quinone avarone and its derivatives**

Irena Novaković<sup>†</sup>, Uroš Anđelković<sup>†,‡</sup>, Mario Zlatović<sup>§</sup>, Miroslav J. Gašić<sup>†,‡</sup>, and Dušan Sladić<sup>§</sup>

<sup>†</sup>IHTM, Center for Chemistry, Njegoševa 12, 11000 Belgrade, Serbia

<sup>‡</sup>Institute of Medical Physics and Biophysics, University of Leipzig, Härtelstr. 16-18, D-04107  
Leipzig, Germany

<sup>§</sup>Faculty of Chemistry, University of Belgrade, Studentski trg 12-16, 11000 Belgrade,  
Serbia

<sup>‡</sup>Serbian Academy of Sciences and Arts, Knez Mihailova 35, 11000 Belgrade, Serbia

E-mail: dsladic@chem.bg.ac.rs

**Mass spectra of the conjugates before and after tryptic digestion.**

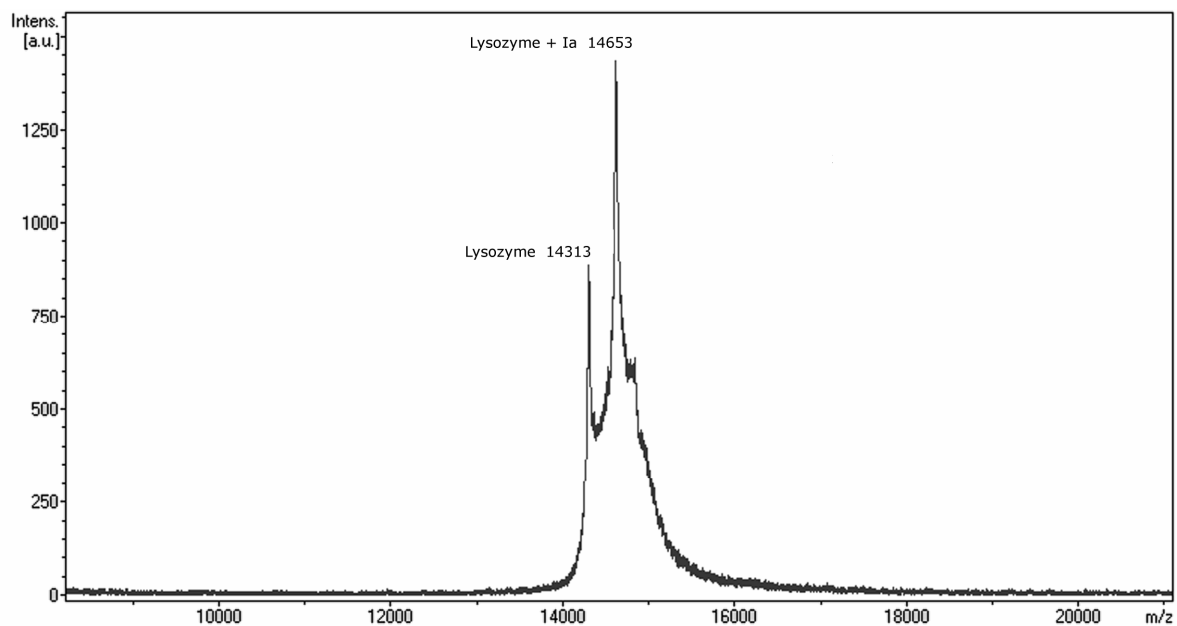

**Figure S1.** MALDI TOF mass spectrum of lysozyme and its conjugate with 3'-methoxyavarone.

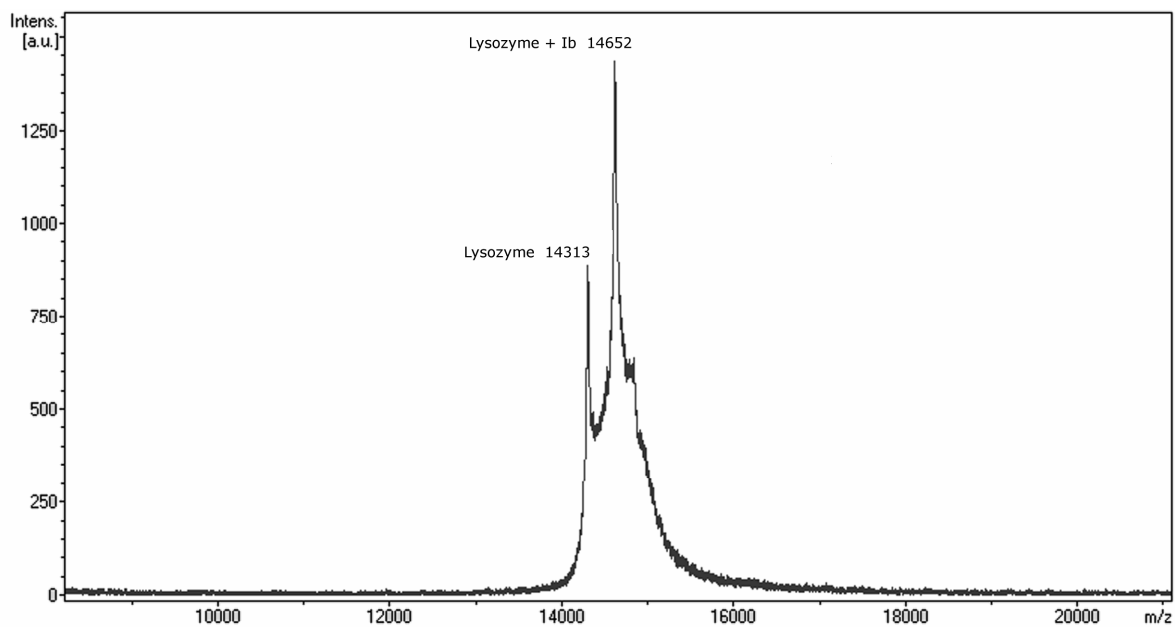

**Figure S2.** MALDI TOF mass spectrum of lysozyme and its conjugate with 4'-(methylamino)avarone.

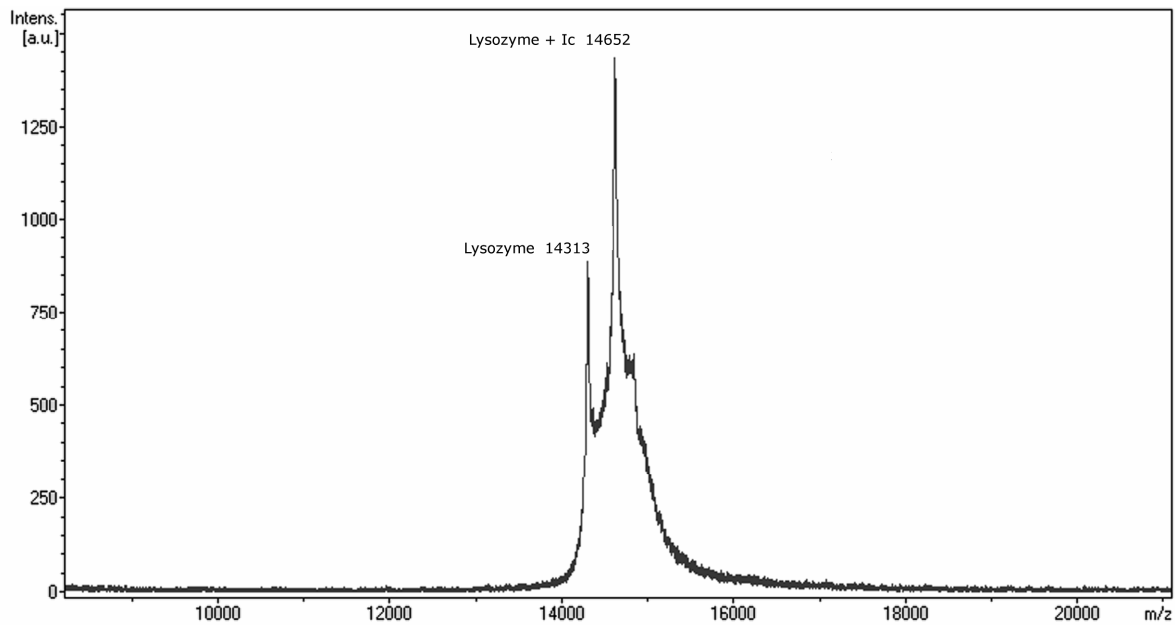

**Figure S3.** MALDI TOF mass spectrum of lysozyme and its conjugate with 3'-(methylamino)avarone.

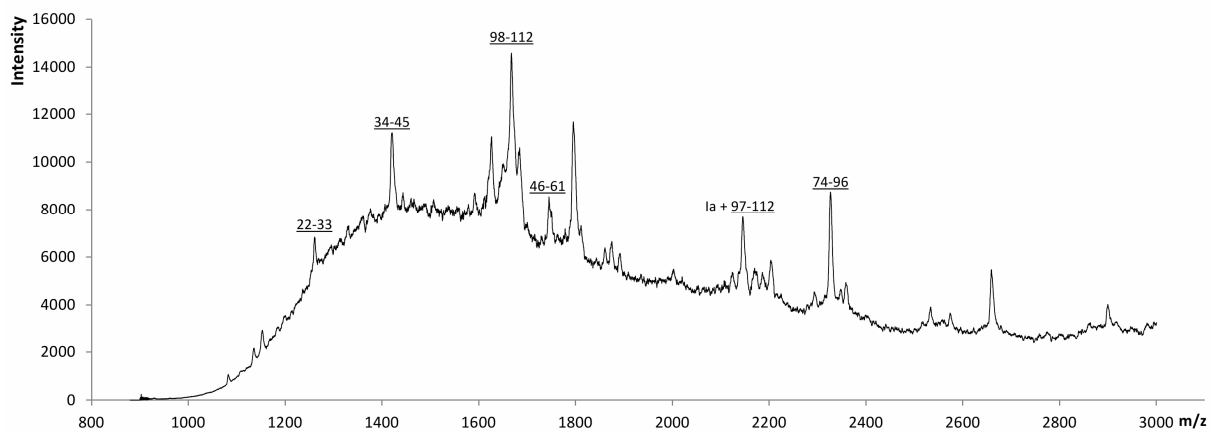

**Figure S4.** MALDI TOF mass spectrum of lysozyme-3'-methoxyavarone conjugate after tryptic digestion.

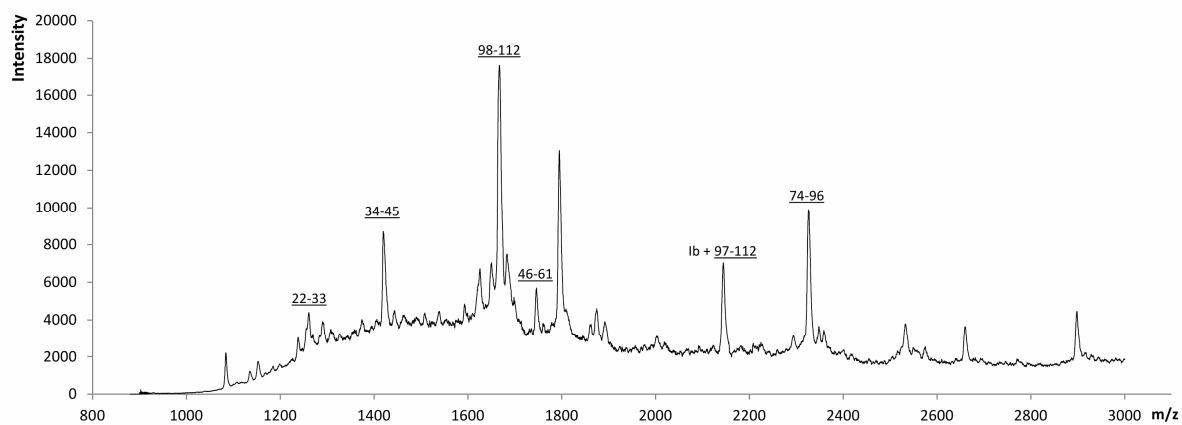

**Figure S5.** MALDI TOF mass spectrum of lysozyme-4'-(methylamino)avarone conjugate after tryptic digestion.

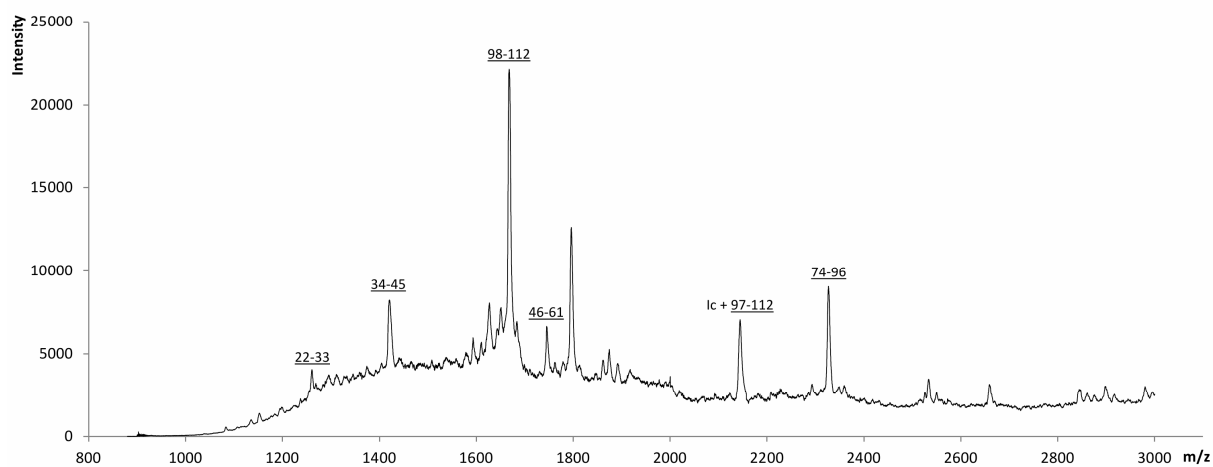

**Figure S6.** MALDI TOF mass spectrum of lysozyme-3'-(methylamino)avarone conjugate after tryptic digestion.
